# Supplementary material for: Combination of mild therapeutic hypothermia and adipose-derived stem cells for ischemic brain injury
Source: PubMed Central journal article supplement — Neural Regen Res. 2018 Oct;13(10):1759–70. doi: 10.4103/1673-5374.238617 (PMC6128055; doi:10.4103/1673-5374.238617), 2018-10
Supplement: NRR-13-1759_Suppl1.pdf [file NRR-13-1759_Suppl1.pdf]

**Open peer review report 1**

**Reviewer:** Da-Zhi Liu, University of California at Davis, USA.

**Comments to the authors:**

The authors described combination of mild hypothermia and adipose-derived stem cells in treatment of stroke. The data generally supported conclusions. However, the authors needed to cite one previous publication (Neural Regen Res. 2014 Oct 1; 9(19): 1745-1752). Note that it was inappropriate to use SH-SY5Y cell line instead of primary neuron cultures for cell viability and cytotoxicity assessments, as SH-SY5Y cells (tumor cells) have different phenotype from primary neurons.
